# Supplementary material
Source: publisher figshare collection journal article supplement (https://acs.figshare.com/ndownloader/files/25505959)
Supplement: Supplementary file 1 [file 25505959]

## Supplementary Material

### Can Statistical Evaluation Tools for Chromatographic Method Development Assist in the Natural Products Workflow? A Case Study on Selected Species of the Plant Family Malpighiaceae

Helena Mannocho-Russo,<sup>\*,†,‡</sup> Paula Carolina P. Bueno,<sup>§,^</sup> Anelize Bauermeister,<sup>‡,||</sup> Rafael Felipe de Almeida,<sup>∇</sup> Pieter C. Dorrestein,<sup>‡</sup> Alberto José Cavaleiro,<sup>†</sup> and Vanderlan S. Bolzani<sup>\*,†</sup>

<sup>†</sup>*NuBBE, Department of Biochemistry and Organic Chemistry, Institute of Chemistry, São Paulo State University (UNESP), Araraquara, SP, Brazil;*

<sup>‡</sup>*Collaborative Mass Spectrometry Innovation Center, Skaggs School of Pharmacy and Pharmaceutical Sciences, University of California, San Diego, CA, USA;*

<sup>§</sup>*Faculty of Pharmaceutical Sciences of Ribeirão Preto, Department of Physics and Chemistry, University of São Paulo, Ribeirão Preto, SP, Brazil;*

<sup>^</sup>*Max Planck Institute of Molecular Plant Physiology, Potsdam-Golm, Germany;*

<sup>||</sup>*Biomedical Sciences Institute, University of São Paulo, São Paulo, SP, Brazil;*

<sup>∇</sup>*Lamol Lab, Feira de Santana State University (UEFS), Department of Biological Sciences, Feira de Santana, BA, Brazil.*

\*Authors for correspondence: Prof. Dr. Vanderlan da Silva Bolzani; M.Sc. Helena Mannocho-Russo.

Phone number: + 55 16 3301 9660; Fax number: + 55 16 33222308; e-mail: vanderlan.bolzani@unesp.br; helenamrusso@gmail.com

**Authors contribution**

H.M.R. designed the research, performed the UHPLC-PDA and UHPLC-HRMS/MS analyses, processed the data, wrote the manuscript, and revised the manuscript. P.C.P.B. Assisted in the validation procedure, wrote the manuscript, and revised the manuscript. A.B. Assisted in the MS/MS data analysis, wrote the manuscript, and revised the manuscript. R.F.A. provided the plant material, identified the species, and revised the manuscript. P.C.D. provided consultation on the manuscript elaboration and revised the manuscript. A.J.C. designed the research and revised the manuscript. V.S.B. designed the research, acquired funding, and revised the manuscript. All authors have approved to the final version of the manuscript.

**Figure S1.** Workflow followed for chromatographic method development. (a) The QbD software created and exported the methods needed for the method development directly to the UHPLC software. The chromatograms are processed and the selected responses (for instance, number of total peaks, number of peaks with high resolution and low tailing) are imported back to the QbD software, which provides the statistical analyses for the responses selected (such as the Analysis of Variance, mathematical equations and surface response). (b) Three main steps were followed in the chromatographic method development: screening, optimization and robustness simulator. The designs, variables chosen, and fixed parameters are described. (c) Chromatograms with the higher responses obtained for the RSMS sample for each step are shown (275 nm), such as the conditions employed.....6

**Table S2.** Description of the columns selected for the chromatographic method development.....8

**Table S3.** Factors levels, coded values and results of the experimental design for the **screening** step. Constant parameters: temperature (40 °C), injection volume (2 µL), flow rate (0.35 µL min<sup>-1</sup>). .....9

**Table S4.** Regression ANOVA statistics obtained for the **screening step** of the chromatographic method development for the responses selected. ....12

**Box S5.** Equations and Pareto chart obtained for the responses selected for the **screening step** during the chromatographic method development. ....13

**Table S6.** Factor levels, coded values and results of the experimental design for the **first optimization** step. Constant parameters: column (Acquity BEH Shield RP18 – Ethylene Bridged Hybrid C<sub>18</sub>, 1.7 µm, 100 x 2.1 mm), gradient time (30 min), injection volume (2 µL), flow rate (0.35 µL min<sup>-1</sup>). .....14

**Table S7.** Regression ANOVA statistics obtained for the **first optimization step** of the chromatographic method development for the responses selected. ....15

|                                                                                                                                                                                                                                                                                                                                                                                                                                                                                                                                                                                                                                                                                                                                                                                                                                                                                                                                                   |    |
|---------------------------------------------------------------------------------------------------------------------------------------------------------------------------------------------------------------------------------------------------------------------------------------------------------------------------------------------------------------------------------------------------------------------------------------------------------------------------------------------------------------------------------------------------------------------------------------------------------------------------------------------------------------------------------------------------------------------------------------------------------------------------------------------------------------------------------------------------------------------------------------------------------------------------------------------------|----|
| <b>Box S8.</b> Equations and Pareto chart obtained for the responses selected for the <b>first optimization step</b> during the chromatographic method development.....                                                                                                                                                                                                                                                                                                                                                                                                                                                                                                                                                                                                                                                                                                                                                                           | 16 |
| <b>Table S9.</b> Factor levels, coded values and results of the experimental design for the <b>second optimization</b> step. Constant parameters: column (Acquity BEH Shield RP18 – Ethylene Bridged Hybrid C <sub>18</sub> , 1.7 µm, 100 x 2.1 mm), gradient time (30 min), pH (2.26), temperature (45 °C), injection volume (2 µL), flow rate (0.35 µL min <sup>-1</sup> ).....                                                                                                                                                                                                                                                                                                                                                                                                                                                                                                                                                                 | 17 |
| <b>Table S10.</b> Regression ANOVA statistics obtained for the <b>second optimization step</b> of the chromatographic method development for the responses selected. ....                                                                                                                                                                                                                                                                                                                                                                                                                                                                                                                                                                                                                                                                                                                                                                         | 18 |
| <b>Box S11.</b> Equations and Pareto chart obtained for the responses selected for the <b>second optimization step</b> in the chromatographic method development. ....                                                                                                                                                                                                                                                                                                                                                                                                                                                                                                                                                                                                                                                                                                                                                                            | 19 |
| <b>Table S12.</b> Metabolites identified by UHPLC-ESI-MS <sup>2</sup> and Molecular Network in the extracts present in the RSMS sample, in the positive ionization mode.....                                                                                                                                                                                                                                                                                                                                                                                                                                                                                                                                                                                                                                                                                                                                                                      | 20 |
| <b>Table S13.</b> List of plant species used for the representative sample of Malpighiaceae species (RSMS) preparation: collection sites, dates and voucher codes, biomes and phylogenetic groups. ....                                                                                                                                                                                                                                                                                                                                                                                                                                                                                                                                                                                                                                                                                                                                           | 26 |
| <b>Figure S14.</b> Field photographs of one species from each phylogenetic group form Malpighiaceae family. White - Byrsonimoid clade represented by the species <i>Byrsonima intermedia</i> (photograph by R.F. Almeida), Red - Acridocarpoid clade (not sampled in this study), Black - Mcvaughoid clade represented by the species <i>Mcvaughia bahiana</i> (photograph by I.R. Guesdon), Light Blue - Barnebyoid clade represented by the species <i>Barnebya harleyi</i> (photograph by F. Flores), Pink - Ptilochaetoid clade represented by the species <i>Ptilochaeta densiflora</i> (photograph by R.F. Almeida), Light Green - Bunchosoid clade represented by the species <i>Bunchosia maritima</i> (photograph by J.M.Braga), Purple - Hiraeoid clade represented by the species <i>Hiraea restingae</i> (photograph by R.F. Almeida), Dark Green - Tetrapteroid clade represented by the species <i>Niedenzuella multiglandulosa</i> |    |

|                                                                                                                                                                                                                                                                                                                                                           |    |
|-----------------------------------------------------------------------------------------------------------------------------------------------------------------------------------------------------------------------------------------------------------------------------------------------------------------------------------------------------------|----|
| (photograph by N. Carvalho, Yellow - Stigmaphylloid clade represented by the species <i>Banisteriopsis laevifolia</i> (photograph by C.F. Hall), and Dark Blue - Malpighioid clade represented by the species <i>Amorimia septentrionalis</i> (photograph by M.O.O. Pellegrini) (phylogenetic classification according to Davis and Anderson 2010). ..... | 27 |
| <b>S15. Method validation</b> .....                                                                                                                                                                                                                                                                                                                       | 28 |

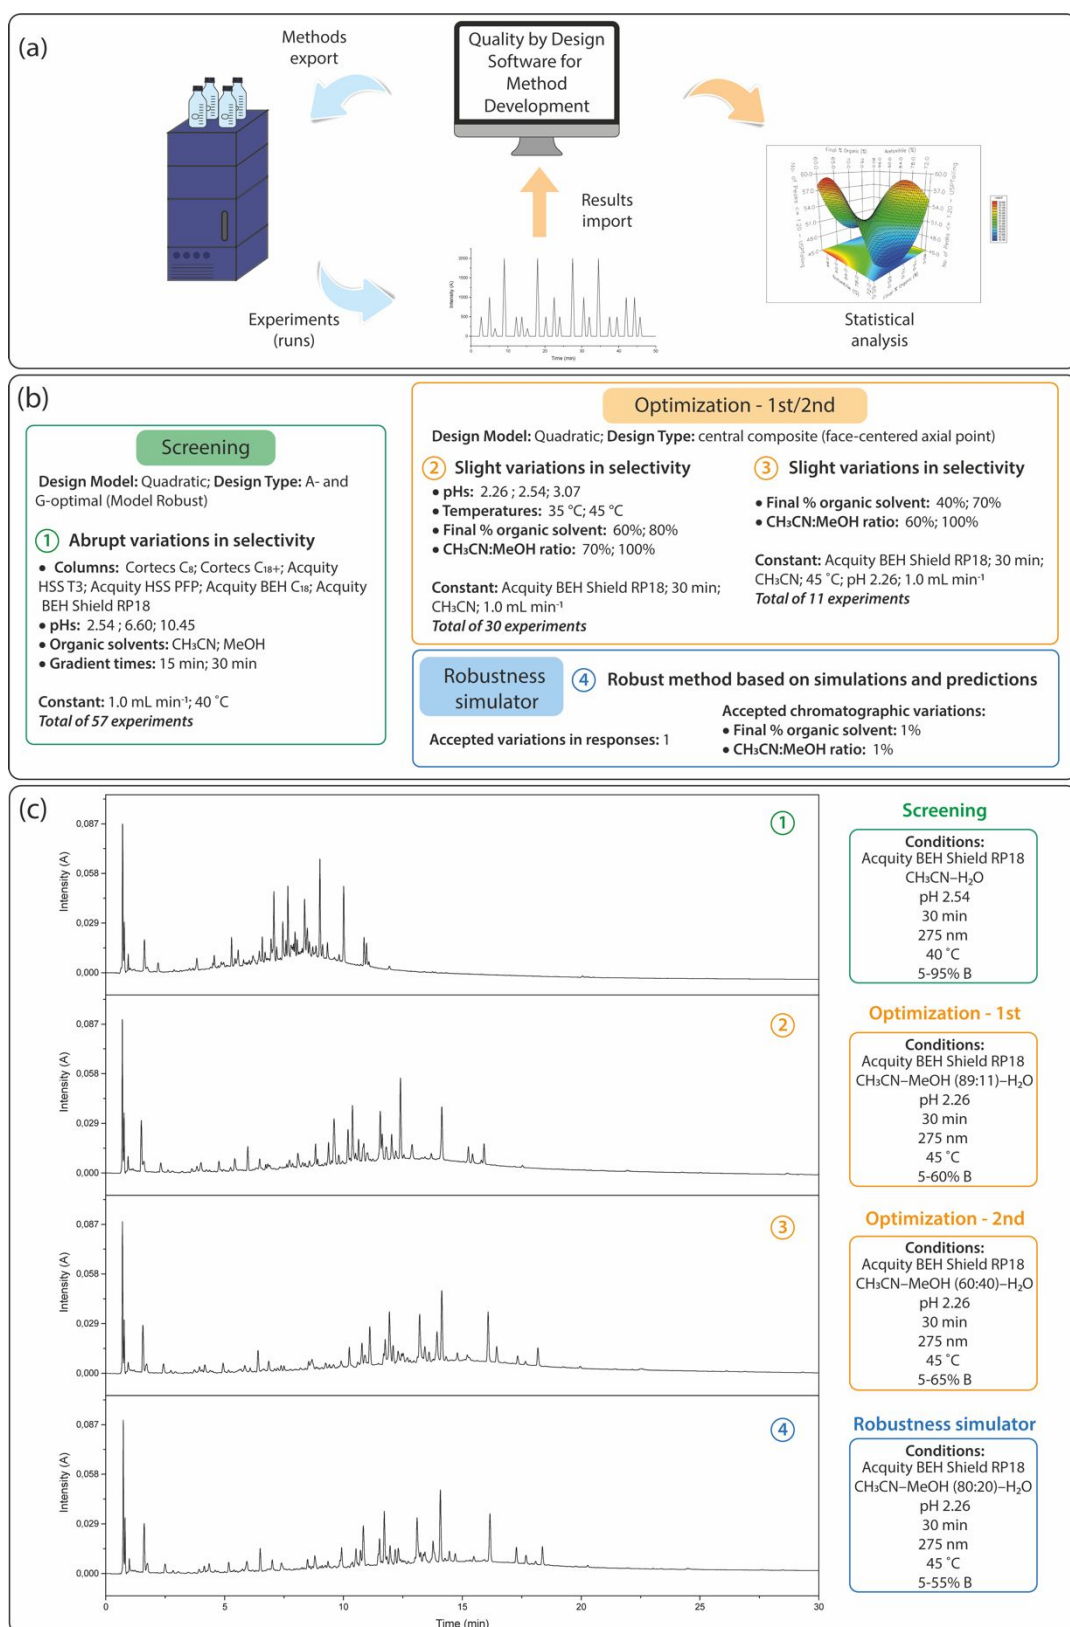

**Figure S1.** Workflow followed for chromatographic method development. (a) The QbD software created and exported the methods needed for the method development directly to the UHPLC software. The chromatograms are processed and the selected responses (for

instance, number of total peaks, number of peaks with high resolution and low tailing) are imported back to the QbD software, which provides the statistical analyses for the responses selected (such as the Analysis of Variance, mathematical equations and surface response).

(b) Three main steps were followed in the chromatographic method development: screening, optimization and robustness simulator. The designs, variables chosen, and fixed parameters are described. (c) Chromatograms with the higher responses obtained for the RSMS sample for each step are shown (275 nm), such as the conditions employed.

**Table S2.** Description of the columns selected for the chromatographic method development.

| Column      | Particle                | Bonded phase                   | pH range | Max temperature (°C)    | Particle size (µm) |
|-------------|-------------------------|--------------------------------|----------|-------------------------|--------------------|
| Cortecs     | Solid Core              | C <sub>8</sub>                 | 2–8      | 45                      | 1.6                |
| Acquity HSS | High Strength Silica    | T3 (C <sub>18</sub> )          | 2–8      | 45                      | 1.8                |
| Acquity BEH | Ethylene Bridged Hybrid | Shield RP18 (C <sub>18</sub> ) | 2–11     | High pH: 45; Low pH: 50 | 1.7                |
| Acquity HSS | High Strength Silica    | PFP (pentafluorophenyl)        | 2–8      | 45                      | 1.8                |
| Cortecs     | Solid Core              | C <sub>18</sub> <sup>+</sup>   | 2–8      | 45                      | 1.6                |
| Acquity BEH | Ethylene Bridged Hybrid | C <sub>18</sub>                | 2–12     | High pH: 60; Low pH: 80 | 1.7                |



**Table S3.** Factors levels, coded values and results of the experimental design for the **screening** step. Constant parameters: temperature (40 °C), injection volume (2 µL), flow rate (0.35 µL min<sup>-1</sup>).

| Run | Variables          |                     |      |                                      | Responses             |                                            |                                            |                                         |
|-----|--------------------|---------------------|------|--------------------------------------|-----------------------|--------------------------------------------|--------------------------------------------|-----------------------------------------|
|     | Organic Solvent    | Gradient time (min) | pH   | Column                               | Total number of peaks | Number of peaks with resolution $\geq 1.5$ | Number of peaks with resolution $\geq 2.0$ | Number of peaks with tailing $\leq 1.2$ |
| 1   | CH <sub>3</sub> CN | 18.8                | 2.54 | Acquity HSS T3                       | 58                    | 32                                         | 18                                         | 35                                      |
| 2   | CH <sub>3</sub> CN | 26.6                | 2.54 | Cortecs C <sub>18</sub> <sup>+</sup> | 64                    | 40                                         | 26                                         | 43                                      |
| 3   | CH <sub>3</sub> CN | 30.0                | 2.54 | Acquity BEH Shield RP18              | 69                    | 42                                         | 26                                         | 53                                      |
| 4   | CH <sub>3</sub> CN | 15.0                | 2.54 | Acquity BEH Shield RP18              | 61                    | 39                                         | 25                                         | 47                                      |
| 5   | CH <sub>3</sub> CN | 30.0                | 2.54 | Acquity BEH C <sub>18</sub>          | 64                    | 33                                         | 20                                         | 49                                      |
| 6   | CH <sub>3</sub> CN | 15.0                | 2.54 | Acquity BEH C <sub>18</sub>          | 59                    | 27                                         | 18                                         | 45                                      |
| 7   | CH <sub>3</sub> CN | 22.5                | 2.54 | Acquity HSS PFP                      | 47                    | 30                                         | 22                                         | 28                                      |
| 8   | CH <sub>3</sub> CN | 15.0                | 2.54 | Acquity BEH Shield RP18              | 61                    | 37                                         | 23                                         | 42                                      |
| 9   | CH <sub>3</sub> CN | 22.5                | 6.60 | Cortecs C <sub>8</sub>               | 47                    | 28                                         | 18                                         | 29                                      |
| 10  | CH <sub>3</sub> CN | 22.5                | 6.60 | Acquity HSS T3                       | 54                    | 31                                         | 18                                         | 37                                      |
| 11  | CH <sub>3</sub> CN | 22.5                | 6.60 | Acquity BEH Shield RP18              | 48                    | 30                                         | 20                                         | 30                                      |
| 12  | CH <sub>3</sub> CN | 22.5                | 6.60 | Acquity HSS PFP                      | 35                    | 24                                         | 14                                         | 23                                      |
| 13  | CH <sub>3</sub> CN | 22.5                | 6.60 | Cortecs C <sub>18</sub> <sup>+</sup> | 46                    | 27                                         | 17                                         | 28                                      |
| 14  | CH <sub>3</sub> CN | 22.5                | 6.60 | Acquity BEH C <sub>18</sub>          | 45                    | 31                                         | 16                                         | 32                                      |
| 15  | CH <sub>3</sub> CN | 30.0                | 6.60 | Cortecs C <sub>8</sub>               | 49                    | 31                                         | 23                                         | 34                                      |
| 16  | CH <sub>3</sub> CN | 15.0                | 6.60 | Cortecs C <sub>8</sub>               | 39                    | 23                                         | 14                                         | 27                                      |
| 17  | CH <sub>3</sub> CN | 30.0                | 6.60 | Acquity HSS T3                       | 58                    | 32                                         | 21                                         | 40                                      |
| 18  | CH <sub>3</sub> CN | 15.0                | 6.60 | Acquity HSS T3                       | 49                    | 25                                         | 13                                         | 36                                      |
| 19  | CH <sub>3</sub> CN | 30.0                | 6.60 | Acquity HSS PFP                      | 40                    | 25                                         | 17                                         | 28                                      |
| 20  | CH <sub>3</sub> CN | 15.0                | 6.60 | Acquity HSS PFP                      | 41                    | 20                                         | 14                                         | 26                                      |
| 21  | CH <sub>3</sub> CN | 30.0                | 6.60 | Cortecs C <sub>18</sub> <sup>+</sup> | 45                    | 33                                         | 25                                         | 26                                      |
| 22  | CH <sub>3</sub> CN | 15.0                | 6.60 | Cortecs C <sub>18</sub> <sup>+</sup> | 43                    | 20                                         | 17                                         | 29                                      |

|    |                    |      |       |                                      |    |    |    |    |
|----|--------------------|------|-------|--------------------------------------|----|----|----|----|
| 23 | CH <sub>3</sub> CN | 22.5 | 6.60  | Cortecs C <sub>8</sub>               | 45 | 27 | 20 | 30 |
| 24 | CH <sub>3</sub> CN | 22.5 | 6.60  | Acquity HSS T3                       | 57 | 34 | 18 | 36 |
| 25 | CH <sub>3</sub> CN | 22.5 | 6.60  | Acquity BEH<br>Shield RP18           | 43 | 27 | 20 | 29 |
| 26 | CH <sub>3</sub> CN | 22.5 | 6.60  | Acquity HSS<br>PFP                   | 38 | 19 | 17 | 20 |
| 27 | CH <sub>3</sub> CN | 22.5 | 6.60  | Cortecs C <sub>18</sub> <sup>+</sup> | 44 | 28 | 16 | 23 |
| 28 | CH <sub>3</sub> CN | 22.5 | 6.60  | Acquity BEH<br>C <sub>18</sub>       | 49 | 30 | 18 | 36 |
| 29 | CH <sub>3</sub> CN | 18.8 | 10.45 | Acquity BEH<br>Shield RP18           | 47 | 32 | 25 | 36 |
| 30 | CH <sub>3</sub> CN | 30.0 | 10.45 | Acquity BEH<br>Shield RP18           | 43 | 26 | 24 | 37 |
| 31 | CH <sub>3</sub> CN | 22.5 | 10.45 | Acquity BEH<br>C <sub>18</sub>       | 43 | 29 | 22 | 33 |
| 32 | MeOH               | 26.3 | 2.54  | Acquity BEH<br>Shield RP18           | 57 | 33 | 22 | 45 |
| 33 | MeOH               | 30.0 | 2.54  | Acquity HSS T3                       | 55 | 34 | 24 | 45 |
| 34 | MeOH               | 15.0 | 2.54  | Acquity HSS T3                       | 56 | 27 | 15 | 42 |
| 35 | MeOH               | 30.0 | 2.54  | Acquity HSS<br>PFP                   | 45 | 31 | 24 | 35 |
| 36 | MeOH               | 15.0 | 2.54  | Acquity HSS<br>PFP                   | 51 | 24 | 15 | 39 |
| 37 | MeOH               | 30.0 | 2.54  | Cortecs C <sub>18</sub> <sup>+</sup> | 53 | 40 | 31 | 36 |
| 38 | MeOH               | 15.0 | 2.54  | Cortecs C <sub>18</sub> <sup>+</sup> | 56 | 30 | 17 | 37 |
| 39 | MeOH               | 22.5 | 2.54  | Cortecs C <sub>8</sub>               | 57 | 40 | 24 | 45 |
| 40 | MeOH               | 30.0 | 2.54  | Acquity HSS T3                       | 55 | 37 | 25 | 45 |
| 41 | MeOH               | 15.0 | 2.54  | Cortecs C <sub>18</sub> <sup>+</sup> | 58 | 34 | 21 | 36 |
| 42 | MeOH               | 22.5 | 6.60  | Cortecs C <sub>8</sub>               | 44 | 30 | 16 | 32 |
| 43 | MeOH               | 22.5 | 6.60  | Acquity HSS T3                       | 47 | 24 | 18 | 33 |
| 44 | MeOH               | 22.5 | 6.60  | Acquity BEH<br>Shield RP18           | 37 | 24 | 16 | 26 |
| 45 | MeOH               | 22.5 | 6.60  | Acquity HSS<br>PFP                   | 39 | 24 | 19 | 30 |
| 46 | MeOH               | 22.5 | 6.60  | Cortecs C <sub>18</sub> <sup>+</sup> | 43 | 28 | 22 | 33 |
| 47 | MeOH               | 22.5 | 6.60  | Acquity BEH<br>C <sub>18</sub>       | 42 | 22 | 15 | 32 |
| 48 | MeOH               | 22.5 | 6.60  | Cortecs C <sub>8</sub>               | 40 | 27 | 18 | 30 |
| 49 | MeOH               | 22.5 | 6.60  | Acquity HSS T3                       | 50 | 28 | 19 | 37 |
| 50 | MeOH               | 22.5 | 6.60  | Acquity BEH<br>Shield RP18           | 32 | 22 | 16 | 21 |

|           |      |      |       |                                      |    |    |    |    |
|-----------|------|------|-------|--------------------------------------|----|----|----|----|
| <b>51</b> | MeOH | 22.5 | 6.60  | Acquity HSS<br>PFP                   | 35 | 20 | 16 | 25 |
| <b>52</b> | MeOH | 22.5 | 6.60  | Cortecs C <sub>18</sub> <sup>+</sup> | 39 | 28 | 19 | 29 |
| <b>53</b> | MeOH | 22.5 | 6.60  | Acquity BEH<br>C <sub>18</sub>       | 40 | 24 | 17 | 32 |
| <b>54</b> | MeOH | 30.0 | 10.45 | Acquity BEH<br>Shield RP18           | 40 | 29 | 21 | 32 |
| <b>55</b> | MeOH | 15.0 | 10.45 | Acquity BEH<br>Shield RP18           | 43 | 27 | 19 | 29 |
| <b>56</b> | MeOH | 30.0 | 10.45 | Acquity BEH<br>C <sub>18</sub>       | 46 | 29 | 20 | 39 |
| <b>57</b> | MeOH | 15.0 | 10.45 | Acquity BEH<br>C <sub>18</sub>       | 50 | 26 | 19 | 42 |

**Table S4.** Regression ANOVA statistics obtained for the **screening step** of the chromatographic method development for the responses selected.

| <b>Response<br/>(Screening)</b>                                                                                                                                                         | <b>Source of Variation</b> | <b>Sum of Squares</b> | <b>Degrees of Freedom</b> | <b>Mean Square</b> | <b>F-Ratio</b> | <b>P-Value</b> |
|-----------------------------------------------------------------------------------------------------------------------------------------------------------------------------------------|----------------------------|-----------------------|---------------------------|--------------------|----------------|----------------|
| <b>Total Number of Peaks</b><br><br>*MSR: 0.9009; MSR <sub>threshold</sub> : 0.0440<br>**MS-LOF: 0.0255; MS-LOF <sub>threshold</sub> : 0.0301                                           | <i>Regression</i>          | 3,504.9995            | 10                        | 350.4999           | 41.8169        | <0.0001        |
|                                                                                                                                                                                         | <i>Residual</i>            | 385.5619              | 46                        | 8.3818             |                |                |
|                                                                                                                                                                                         | <i>Lack-of-fit</i>         | 307.0619              | 31                        | 9.9052             | 1.8927         | 0.0956         |
|                                                                                                                                                                                         | <i>Pure error</i>          | 78.5000               | 15                        | 5.2333             |                |                |
|                                                                                                                                                                                         | <i>Total</i>               | 3,890.5614            | 56                        |                    |                |                |
| <b>Number of peaks with resolution <math>\geq 1.5</math></b><br><br>*MSR: 0.7811; MSR <sub>threshold</sub> : 0.0780<br>**MS-LOF: 0.0439; MS-LOF <sub>threshold</sub> : 0.0450           | <i>Regression</i>          | 1,281.7256            | 8                         | 160.2157           | 21.4063        | <0.0001        |
|                                                                                                                                                                                         | <i>Residual</i>            | 359.2568              | 48                        | 7.4845             |                |                |
|                                                                                                                                                                                         | <i>Lack-of-fit</i>         | 297.2568              | 33                        | 9.0078             | 2.1793         | 0.0550         |
|                                                                                                                                                                                         | <i>Pure error</i>          | 62.000                | 15                        | 4.1333             |                |                |
|                                                                                                                                                                                         | <i>Total</i>               | 1,640.9825            | 56                        |                    |                |                |
| <b>Number of peaks with resolution <math>\geq 2.0</math></b><br><br>*MSR: 0.8671; MSR <sub>threshold</sub> : 0.0857<br>**MS-LOF: 0.0475; MS-LOF <sub>threshold</sub> : 0.0872           | <i>Regression</i>          | 693.8530              | 14                        | 49.5609            | 19.5713        | <0.0001        |
|                                                                                                                                                                                         | <i>Residual</i>            | 106.3575              | 42                        | 2.5323             |                |                |
|                                                                                                                                                                                         | <i>Lack-of-fit</i>         | 73.3575               | 27                        | 2.7169             | 1.2350         | 0.3412         |
|                                                                                                                                                                                         | <i>Pure error</i>          | 33.0000               | 15                        | 2.2000             |                |                |
|                                                                                                                                                                                         | <i>Total</i>               | 800.2105              | 56                        |                    |                |                |
| <b>Number of peaks with tailing <math>\leq 1.2</math></b><br><br>*MSR: 0.8138; MSR <sub>threshold</sub> : 0.0827<br>**MS-LOF: 0.0513; MS-LOF <sub>threshold</sub> : 0.0407 <sup>φ</sup> | <i>Regression</i>          | 2,462.2860            | 10                        | 246.2286           | 20.1102        | <0.0001        |
|                                                                                                                                                                                         | <i>Residual</i>            | 563.2227              | 46                        | 12.2440            |                |                |
|                                                                                                                                                                                         | <i>Lack-of-fit</i>         | 480.7227              | 31                        | 15.5072            | 2.8195         | 0.0184         |
|                                                                                                                                                                                         | <i>Pure error</i>          | 82.5000               | 15                        | 5.5000             |                |                |
|                                                                                                                                                                                         | <i>Total</i>               | 3,025.5088            | 56                        |                    |                |                |

\*Modeling goal:  $MSR \geq MSR_{threshold}$ .

\*\*Modeling goal:  $MS-LOF \leq MS-LOF_{threshold}$ .

<sup>φ</sup>LOF is statistically significant (P-value < 0.0500).

**Box S5.** Equations and Pareto chart obtained for the responses selected for the **screening step** during the chromatographic method development.

| Response<br>(Screening)                    | Equation* | Model Term Ranking Pareto Chart** |
|--------------------------------------------|-----------|-----------------------------------|
| Total Number of Peaks                      |           |                                   |
| Number of peaks with resolution $\geq 1.5$ |           |                                   |
| Number of peaks with resolution $\geq 2.0$ |           |                                   |
| Number of peaks with tailing $\leq 1.2$    |           |                                   |

\*A: strong solvent type; A (L2): methanol; B: gradient time; C: pH; D: column type; D (L2): Acquity HSS T3; D (L3): Acquity BEH Shield RP18; D (L4): Acquity HSS PFP; D (L5): Cortecs C<sub>18</sub><sup>+</sup>; D (L6): Acquity BEH C<sub>18</sub>.

\*\*Blue: positive effects; Grey: negative effects.

**Table S6.** Factor levels, coded values and results of the experimental design for the **first optimization** step. Constant parameters: column (Acquity BEH Shield RP18 – Ethylene Bridged Hybrid C<sub>18</sub>, 1.7  $\mu$ m, 100 x 2.1 mm), gradient time (30 min), injection volume (2  $\mu$ L), flow rate (0.35  $\mu$ L min<sup>-1</sup>).

| Run | Variables               |                                      |                       |      | Responses             |                                            |                                            |                                         |
|-----|-------------------------|--------------------------------------|-----------------------|------|-----------------------|--------------------------------------------|--------------------------------------------|-----------------------------------------|
|     | Final % organic solvent | CH <sub>3</sub> CN % organic solvent | Oven temperature (°C) | pH   | Total number of peaks | Number of peaks with resolution $\geq 1.5$ | Number of peaks with resolution $\geq 2.0$ | Number of peaks with tailing $\leq 1.2$ |
| 1   | 80                      | 100                                  | 35                    | 2.26 | 64                    | 39                                         | 21                                         | 51                                      |
| 2   | 80                      | 70                                   | 35                    | 2.26 | 63                    | 42                                         | 31                                         | 49                                      |
| 3   | 60                      | 100                                  | 35                    | 2.26 | 71                    | 49                                         | 32                                         | 57                                      |
| 4   | 60                      | 70                                   | 35                    | 2.26 | 58                    | 43                                         | 32                                         | 44                                      |
| 5   | 60                      | 70                                   | 35                    | 2.26 | 56                    | 41                                         | 31                                         | 43                                      |
| 6   | 80                      | 70                                   | 35                    | 2.26 | 59                    | 42                                         | 29                                         | 49                                      |
| 7   | 60                      | 100                                  | 35                    | 2.26 | 74                    | 46                                         | 28                                         | 61                                      |
| 8   | 70                      | 85                                   | 35                    | 2.57 | 67                    | 46                                         | 29                                         | 55                                      |
| 9   | 60                      | 70                                   | 35                    | 3.07 | 51                    | 38                                         | 30                                         | 42                                      |
| 10  | 80                      | 70                                   | 35                    | 3.07 | 60                    | 38                                         | 30                                         | 46                                      |
| 11  | 60                      | 100                                  | 35                    | 3.07 | 64                    | 44                                         | 30                                         | 48                                      |
| 12  | 80                      | 100                                  | 35                    | 3.07 | 68                    | 40                                         | 26                                         | 48                                      |
| 13  | 70                      | 85                                   | 40                    | 2.26 | 68                    | 41                                         | 29                                         | 50                                      |
| 14  | 60                      | 85                                   | 40                    | 2.57 | 70                    | 40                                         | 28                                         | 58                                      |
| 15  | 80                      | 85                                   | 40                    | 2.57 | 66                    | 41                                         | 26                                         | 50                                      |
| 16  | 70                      | 70                                   | 40                    | 2.57 | 60                    | 44                                         | 29                                         | 48                                      |
| 17  | 70                      | 100                                  | 40                    | 2.57 | 66                    | 38                                         | 27                                         | 53                                      |
| 18  | 70                      | 85                                   | 40                    | 2.57 | 68                    | 44                                         | 27                                         | 59                                      |
| 19  | 70                      | 85                                   | 40                    | 2.57 | 67                    | 39                                         | 30                                         | 56                                      |
| 20  | 70                      | 85                                   | 40                    | 2.57 | 67                    | 39                                         | 29                                         | 56                                      |
| 21  | 70                      | 85                                   | 40                    | 3.07 | 63                    | 41                                         | 27                                         | 51                                      |
| 22  | 60                      | 70                                   | 45                    | 2.26 | 63                    | 43                                         | 33                                         | 48                                      |
| 23  | 80                      | 70                                   | 45                    | 2.26 | 71                    | 42                                         | 30                                         | 57                                      |
| 24  | 60                      | 100                                  | 45                    | 2.26 | 71                    | 44                                         | 27                                         | 57                                      |
| 25  | 80                      | 100                                  | 45                    | 2.26 | 74                    | 40                                         | 26                                         | 51                                      |
| 26  | 70                      | 85                                   | 45                    | 2.57 | 66                    | 46                                         | 29                                         | 56                                      |
| 27  | 60                      | 70                                   | 45                    | 3.07 | 53                    | 37                                         | 31                                         | 45                                      |
| 28  | 80                      | 70                                   | 45                    | 3.07 | 55                    | 38                                         | 27                                         | 44                                      |
| 29  | 60                      | 100                                  | 45                    | 3.07 | 61                    | 37                                         | 23                                         | 53                                      |
| 30  | 80                      | 100                                  | 45                    | 3.07 | 63                    | 33                                         | 21                                         | 48                                      |

**Table S7.** Regression ANOVA statistics obtained for the **first optimization step** of the chromatographic method development for the responses selected.

| <b>Response<br/>(1st optimization)</b>                                                                                                                                        | <b>Source of Variation</b> | <b>Sum of Squares</b> | <b>Degrees of Freedom</b> | <b>Mean Square</b> | <b>F-Ratio</b> | <b>P-Value</b> |
|-------------------------------------------------------------------------------------------------------------------------------------------------------------------------------|----------------------------|-----------------------|---------------------------|--------------------|----------------|----------------|
| <b>Total Number of Peaks</b><br><br>*MSR: 0.9593; MSR <sub>threshold</sub> : 0.0683<br>**MS-LOF: 0.0256; MS-LOF <sub>threshold</sub> : 0.1687                                 | <i>Regression</i>          | 968.3290              | 12                        | 80.6941            | 33.4278        | <0.0001        |
|                                                                                                                                                                               | <i>Residual</i>            | 41.0377               | 17                        | 2.4140             |                |                |
|                                                                                                                                                                               | <i>Lack-of-fit</i>         | 25.8710               | 12                        | 2.1559             | 0.7107         | 0.7102         |
|                                                                                                                                                                               | <i>Pure error</i>          | 15.1667               | 5                         | 3.0333             |                |                |
|                                                                                                                                                                               | <i>Total</i>               | 1,009.3667            | 29                        |                    |                |                |
| <b>Number of peaks with resolution <math>\geq 1.5</math></b><br><br>*MSR: 0.7450; MSR <sub>threshold</sub> : 0.2746<br>**MS-LOF: 0.1111; MS-LOF <sub>threshold</sub> : 0.5798 | <i>Regression</i>          | 247.4675              | 9                         | 27.4964            | 6.4927         | 0.0003         |
|                                                                                                                                                                               | <i>Residual</i>            | 84.6991               | 20                        | 4.2350             |                |                |
|                                                                                                                                                                               | <i>Lack-of-fit</i>         | 61.5325               | 15                        | 4.1022             | 0.8854         | 0.6130         |
|                                                                                                                                                                               | <i>Pure error</i>          | 23.1667               | 5                         | 4.6333             |                |                |
|                                                                                                                                                                               | <i>Total</i>               | 332.1667              | 29                        |                    |                |                |
| <b>Number of peaks with resolution <math>\geq 2.0</math></b><br><br>*MSR: 0.7653; MSR <sub>threshold</sub> : 0.1840<br>**MS-LOF: 0.0714; MS-LOF <sub>threshold</sub> : 0.3932 | <i>Regression</i>          | 189.6903              | 7                         | 27.0986            | 10.2476        | <0.0001        |
|                                                                                                                                                                               | <i>Residual</i>            | 58.1764               | 22                        | 2.6444             |                |                |
|                                                                                                                                                                               | <i>Lack-of-fit</i>         | 43.0097               | 17                        | 2.5300             | 0.8341         | 0.6488         |
|                                                                                                                                                                               | <i>Pure error</i>          | 15.1667               | 5                         | 3.0333             |                |                |
|                                                                                                                                                                               | <i>Total</i>               | 247.8667              | 29                        |                    |                |                |
| <b>Number of peaks with tailing <math>\leq 1.2</math></b><br><br>*MSR: 0.9760; MSR <sub>threshold</sub> : 0.0437<br>**MS-LOF: 0.0163; MS-LOF <sub>threshold</sub> : 0.1027    | <i>Regression</i>          | 0.0000                | 12                        | 0.0000             | 54.1882        | <0.0001        |
|                                                                                                                                                                               | <i>Residual</i>            | <0.0001               | 16                        | <0.0001            |                |                |
|                                                                                                                                                                               | <i>Lack-of-fit</i>         | 0.0000                | 11                        | 0.0000             | 0.7459         | 0.6826         |
|                                                                                                                                                                               | <i>Pure error</i>          | 0.0000                | 5                         | 0.0000             |                |                |
|                                                                                                                                                                               | <i>Total</i>               | 0.0000                | 28                        |                    |                |                |

\*Modeling goal:  $MSR \geq MSR_{threshold}$ .

\*\*Modeling goal:  $MS-LOF \leq MS-LOF_{threshold}$ .

**Box S8.** Equations and Pareto chart obtained for the responses selected for the **first optimization step** during the chromatographic method development.

| Response<br>(1st optimization)             | Equation* | Model Term Ranking Pareto Chart** |
|--------------------------------------------|-----------|-----------------------------------|
| Total Number of Peaks                      |           |                                   |
| Number of peaks with resolution $\geq 1.5$ |           |                                   |
| Number of peaks with resolution $\geq 2.0$ |           |                                   |
| Number of peaks with tailing $\leq 1.2$    |           |                                   |

\*A: final percentage of organic solvent; B: CH<sub>3</sub>CN/MeOH ratio; C: oven temperature; D: pH.

\*\*Blue: positive effects; Grey: negative effects.



**Table S9.** Factor levels, coded values and results of the experimental design for the **second optimization** step. Constant parameters: column (Acquity BEH Shield RP18 – Ethylene Bridged Hybrid C<sub>18</sub>, 1.7  $\mu$ m, 100 x 2.1 mm), gradient time (30 min), pH (2.26), temperature (45 °C), injection volume (2  $\mu$ L), flow rate (0.35  $\mu$ L min<sup>-1</sup>).

| Run | Variables               |                                      | Responses             |                                            |                                            |                                         |
|-----|-------------------------|--------------------------------------|-----------------------|--------------------------------------------|--------------------------------------------|-----------------------------------------|
|     | Final % organic solvent | CH <sub>3</sub> CN % organic solvent | Total number of peaks | Number of peaks with resolution $\geq 1.5$ | Number of peaks with resolution $\geq 2.0$ | Number of peaks with tailing $\leq 1.2$ |
| 1   | 55                      | 100                                  | 92                    | 51                                         | 25                                         | 69                                      |
| 2   | 55                      | 80                                   | 91                    | 51                                         | 31                                         | 76                                      |
| 3   | 40                      | 80                                   | 78                    | 54                                         | 32                                         | 60                                      |
| 4   | 70                      | 100                                  | 90                    | 51                                         | 28                                         | 69                                      |
| 5   | 70                      | 80                                   | 86                    | 53                                         | 32                                         | 66                                      |
| 6   | 40                      | 60                                   | 65                    | 50                                         | 39                                         | 53                                      |
| 7   | 55                      | 60                                   | 80                    | 58                                         | 40                                         | 69                                      |
| 8   | 55                      | 80                                   | 90                    | 48                                         | 30                                         | 72                                      |
| 9   | 55                      | 80                                   | 89                    | 49                                         | 31                                         | 71                                      |
| 10  | 70                      | 60                                   | 84                    | 57                                         | 36                                         | 67                                      |
| 11  | 40                      | 100                                  | 89                    | 58                                         | 34                                         | 65                                      |

**Table S10.** Regression ANOVA statistics obtained for the **second optimization step** of the chromatographic method development for the responses selected.

| <b>Response<br/>(2nd optimization)</b>                                                                                  | <b>Source of Variation</b> | <b>Sum of Squares</b> | <b>Degrees of Freedom</b> | <b>Mean Square</b> | <b>F-Ratio</b> | <b>P-Value</b> |
|-------------------------------------------------------------------------------------------------------------------------|----------------------------|-----------------------|---------------------------|--------------------|----------------|----------------|
| <b>Total Number of Peaks</b><br><br>*MSR: 0.9603; MSR <sub>threshold</sub> : 0.1200                                     | <i>Regression</i>          | 617.3758              | 4                         | 154.3439           | 36.2688        | 0.0002         |
|                                                                                                                         | <i>Residual</i>            | 25.5333               | 6                         | 4.2556             |                |                |
|                                                                                                                         | <i>Lack-of-fit</i>         | 23.5333               | 4                         | 5.8833             | 5.8833         | 0.1505         |
|                                                                                                                         | <i>Pure error</i>          | 2.0000                | 2                         | 1.0000             |                |                |
|                                                                                                                         | <i>Total</i>               | 642.9091              | 10                        |                    |                |                |
| <b>Number of peaks with<br/>resolution <math>\geq 1.5</math></b><br><br>*MSR: 0.5956; MSR <sub>threshold</sub> : 0.4508 | <i>Regression</i>          | 76.3485               | 2                         | 38.1742            | 5.8918         | 0.0267         |
|                                                                                                                         | <i>Residual</i>            | 51.8333               | 8                         | 6.4792             | 3.3690         | 0.2465         |
|                                                                                                                         | <i>Lack-of-fit</i>         | 47.1667               | 6                         | 7.8611             |                |                |
|                                                                                                                         | <i>Pure error</i>          | 4.6667                | 2                         | 2.333              |                |                |
|                                                                                                                         | <i>Total</i>               | 128.1818              | 10                        |                    |                |                |
| <b>Number of peaks with<br/>resolution <math>\geq 2.0</math></b><br><br>*MSR: 0.9535; MSR <sub>threshold</sub> : 0.0629 | <i>Regression</i>          | 189.1769              | 2                         | 94.5885            | 71.7894        | <0.0001        |
|                                                                                                                         | <i>Residual</i>            | 9.2231                | 7                         | 1.3176             | 5.1338         | 0.1710         |
|                                                                                                                         | <i>Lack-of-fit</i>         | 8.5564                | 5                         | 1.7113             |                |                |
|                                                                                                                         | <i>Pure error</i>          | 0.6667                | 2                         | 0.333              |                |                |
|                                                                                                                         | <i>Total</i>               | 198.4000              | 9                         |                    |                |                |
| <b>Number of peaks with<br/>tailing <math>\leq 1.2</math></b><br><br>*MSR: 0.7122; MSR <sub>threshold</sub> : 0.3209    | <i>Regression</i>          | 273.4667              | 2                         | 136.7333           | 9.8963         | 0.0069         |
|                                                                                                                         | <i>Residual</i>            | 110.5333              | 8                         | 13.8167            | 2.2984         | 0.3339         |
|                                                                                                                         | <i>Lack-of-fit</i>         | 96.5333               | 6                         | 16.0889            |                |                |
|                                                                                                                         | <i>Pure error</i>          | 14.0000               | 2                         | 7.0000             |                |                |
|                                                                                                                         | <i>Total</i>               | 384.0000              | 10                        |                    |                |                |

\*Modeling goal: MSR  $\geq$  MSR<sub>threshold</sub>.

**Box S11.** Equations and Pareto chart obtained for the responses selected for the **second optimization step** in the chromatographic method development.

| Response<br>(2nd optimization)             | Equation* | Model Term Ranking Pareto Chart** |
|--------------------------------------------|-----------|-----------------------------------|
| Total Number of Peaks                      |           |                                   |
| Number of peaks with resolution $\geq 1.5$ |           |                                   |
| Number of peaks with resolution $\geq 2.0$ |           |                                   |
| Number of peaks with tailing $\leq 1.2$    |           |                                   |

\*A: final percentage of organic solvent; B: CH<sub>3</sub>CN/MeOH ratio.

\*\*Blue: positive effects; Grey: negative effects.

**Table S12.** Metabolites identified by UHPLC-ESI-MS<sup>2</sup> and Molecular Network in the extracts present in the RSMS sample, in the positive ionization mode.

| # | Rt (min) | Species                   | Molecular Formula                               | [M+H] <sup>+</sup> observed | [M+H] <sup>+</sup> calculated | error (ppm) | MS/MS fragments (% abundance)                                                                                                                                        | Metabolite             |
|---|----------|---------------------------|-------------------------------------------------|-----------------------------|-------------------------------|-------------|----------------------------------------------------------------------------------------------------------------------------------------------------------------------|------------------------|
| 1 | 1.81     | <i>M. bahiana</i>         | C <sub>14</sub> H <sub>17</sub> O <sub>10</sub> | 345.0832                    | 345.0822                      | 2.9         | 153.0202 (100)                                                                                                                                                       | Galloyl quinic acid    |
| 2 | 5.25     | <i>B. intermedia</i>      | C <sub>15</sub> H <sub>15</sub> O <sub>6</sub>  | 291.0877                    | 291.0869                      | 2.7         | 207.0675 (20), 165.0560 (15), 147.0459 (20), 139.0403 (100), 123.0459 (50)                                                                                           | Catechin               |
| 2 | 5.25     | <i>A. septentrionalis</i> | C <sub>15</sub> H <sub>15</sub> O <sub>6</sub>  | 291.0874                    | 291.0869                      | 1.7         | 207.0667 (15), 165.0555 (15), 147.0462 (20), 139.0411 (100), 123.0459 (35)                                                                                           | Catechin               |
| 3 | 5.55     | <i>A. septentrionalis</i> | C <sub>30</sub> H <sub>27</sub> O <sub>12</sub> | 579.1505                    | 579.1503                      | 0.3         | 409.0920 (30), 287.0572 (80), 275.0572 (60), 247.0611 (50), 233.0461 (30), 163.0416 (50), 139.0410 (70), 127.0390 (100), 123.0457 (40)                               | Proanthocyanidin dimer |
| 4 | 5.77     | <i>B. intermedia</i>      | C <sub>30</sub> H <sub>27</sub> O <sub>12</sub> | 579.1501                    | 579.1503                      | -0.3        | 409.0939 (40), 301.0712 (15), 287.0581 (85), 271.0616 (45), 247.0648 (40), 233.0464 (15), 191.0378 (15), 163.0419 (40), 139.0420 (60), 127.0412 (100), 123.0467 (30) | Proanthocyanidin dimer |
| 5 | 6.04     | <i>A. septentrionalis</i> | C <sub>30</sub> H <sub>27</sub> O <sub>12</sub> | 579.1508                    | 579.1503                      | 0.9         | 409.0963 (70), 301.0708 (20), 287.0569 (100), 275.0569 (60), 247.0605 (40), 233.0446 (20), 163.0405 (45), 139.0428 (60), 127.0405 (55), 123.0458 (35)                | Proanthocyanidin dimer |
| 6 | 6.65     | <i>B. intermedia</i>      | C <sub>15</sub> H <sub>15</sub> O <sub>6</sub>  | 291.0877                    | 291.0869                      | 2.7         | 207.0670 (15), 147.0459 (25), 139.0408 (100), 123.0462 (40)                                                                                                          | Epicatechin            |
| 6 | 6.65     | <i>B. laevifolia</i>      | C <sub>15</sub> H <sub>15</sub> O <sub>6</sub>  | 291.0870                    | 291.0869                      | 0.3         | 207.0670 (10), 165.0558 (100), 147.0466 (20), 139.0408 (100), 123.0465 (40)                                                                                          | Epicatechin            |
| 6 | 6.66     | <i>N. multiglandulosa</i> | C <sub>15</sub> H <sub>15</sub> O <sub>6</sub>  | 291.0882                    | 291.0869                      | 4.5         | 207.0660 (15), 165.0559 (15), 147.0463 (20), 139.0408 (100), 123.0457 (35)                                                                                           | Epicatechin            |
| 7 | 7.23     | <i>N. multiglandulosa</i> | C <sub>30</sub> H <sub>27</sub> O <sub>12</sub> | 579.1499                    | 579.1503                      | -0.7        | 409.0945 (45), 301.0731 (35), 287.0569 (90), 275.0583 (70), 247.0613 (35), 233.0454 (20), 163.0408 (70), 139.0403 (70), 127.0413 (100), 123.0779 (35)                | Proanthocyanidin dimer |
| 7 | 7.23     | <i>B. laevifolia</i>      | C <sub>30</sub> H <sub>27</sub> O <sub>12</sub> | 579.1505                    | 579.1503                      | 0.3         | 409.0950 (30), 287.0583 (70), 271.0630 (40), 247.0613 (30), 233.0455 (20),                                                                                           | Proanthocyanidin dimer |

|           |       |                           |                                                 |          |          |      |                                                                                                                                                                                                                                                |                                                                 |
|-----------|-------|---------------------------|-------------------------------------------------|----------|----------|------|------------------------------------------------------------------------------------------------------------------------------------------------------------------------------------------------------------------------------------------------|-----------------------------------------------------------------|
|           |       |                           |                                                 |          |          |      | 163.0404 (40), 139.0422 (60), 127.0408 (100), 123.0458 (30)                                                                                                                                                                                    |                                                                 |
| <b>8</b>  | 7.25  | <i>A. septentrionalis</i> | C <sub>15</sub> H <sub>15</sub> O <sub>5</sub>  | 275.0924 | 275.0919 | 1.8  | 201.0483 (10), 191.0726 (15), 149.0616 (20), 139.0405 (100), 107.0509 (25)                                                                                                                                                                     | Afzelechin                                                      |
| <b>9</b>  | 7.70  | <i>A. septentrionalis</i> | C <sub>27</sub> H <sub>31</sub> O <sub>15</sub> | 595.1657 | 595.1663 | -1.0 | 541.1246 (20), 523.1274 (20), 481.1144 (40), 457.1113 (45), 427.1031 (65), 409.0929 (75), 379.0817 (90), 337.0736 (55), 325.0726 (100), 307.0597 (45), 295.0616 (30)                                                                           | Genistein-di-C-hexoside                                         |
| <b>10</b> | 8.81  | <i>B. intermedia</i>      | C <sub>21</sub> H <sub>19</sub> O <sub>13</sub> | 479.0831 | 479.0826 | 1.0  | 309.0630 (15), 153.0200 (100)                                                                                                                                                                                                                  | Digalloyl shikimic acid                                         |
| <b>11</b> | 8.84  | <i>B. intermedia</i>      | C <sub>21</sub> H <sub>21</sub> O <sub>14</sub> | 497.0938 | 497.0931 | 1.4  | 309.0636 (10), 153.0199 (100)                                                                                                                                                                                                                  | Digalloyl quinic acid                                           |
| <b>12</b> | 8.87  | <i>B. maritima</i>        | C <sub>39</sub> H <sub>51</sub> O <sub>23</sub> | 887.2811 | 887.2821 | -1.1 | 287.0568 (100)                                                                                                                                                                                                                                 | Kaempferol-O-hexoside-deoxyhexoside-deoxyhexoside-deoxyhexoside |
| <b>13</b> | 8.88  | <i>B. intermedia</i>      | C <sub>28</sub> H <sub>25</sub> O <sub>18</sub> | 649.1038 | 649.1041 | -0.5 | 309.0635 (10), 153.0201 (100)                                                                                                                                                                                                                  | Trigalloyl quinic acid                                          |
| <b>14</b> | 9.11  | <i>B. laevifolia</i>      | C <sub>45</sub> H <sub>39</sub> O <sub>18</sub> | 867.2119 | 867.2136 | -2.9 | 545.1077 (10), 527.1068 (15), 419.0790 (30), 409.0927 (60), 407.0764 (55), 393.0641 (30), 301.072 (30), 289.0740 (40), 287.0574 (60), 275.0552 (95), 247.0612 (100), 245.0452 (90), 163.0412 (80), 139.0418 (80), 127.0418 (70), 123.0496 (40) | Proanthocyanidin trimer                                         |
| <b>14</b> | 9.12  | <i>N. multiglandulosa</i> | C <sub>45</sub> H <sub>39</sub> O <sub>18</sub> | 867.2115 | 867.2136 | -2.4 | 545.1047 (15), 527.0963 (25), 409.0902 (65), 407.0797 (40), 393.0627 (20), 301.0681 (25), 289.0714 (55), 287.0561 (70), 247.0615 (100), 245.0453 (90), 163.0425 (75), 127.0416 (70), 123.0459 (45)                                             | Proanthocyanidin trimer                                         |
| <b>15</b> | 9.46  | <i>B. maritima</i>        | C <sub>33</sub> H <sub>41</sub> O <sub>20</sub> | 757.2178 | 757.2191 | -1.7 | 303.1518 (100)                                                                                                                                                                                                                                 | Quercetin-O-hexoside-deoxyhexoside-deoxyhexoside                |
| <b>16</b> | 10.11 | <i>H. restingae</i>       | C <sub>27</sub> H <sub>31</sub> O <sub>14</sub> | 579.1713 | 579.1714 | -0.2 | 433.1136 (100), 415.1046 (55), 397.0939 (40), 379.0836 (10), 367.0835 (20), 337.0737 (15), 313.0727 (60), 283.0600 (10)                                                                                                                        | Apigenin-C-hexoside-deoxyhexoside                               |

|    |       |                           |                                                 |          |          |      |                                                                                                                                                                                                                  |                                                            |
|----|-------|---------------------------|-------------------------------------------------|----------|----------|------|------------------------------------------------------------------------------------------------------------------------------------------------------------------------------------------------------------------|------------------------------------------------------------|
| 17 | 10.20 | <i>B. intermedia</i>      | C <sub>28</sub> H <sub>23</sub> O <sub>17</sub> | 631.0937 | 631.0935 | 0.3  | 153.0201 (100)                                                                                                                                                                                                   | Trigalloyl shikimic acid                                   |
| 18 | 10.31 | <i>B. maritima</i>        | C <sub>33</sub> H <sub>41</sub> O <sub>19</sub> | 741.2253 | 741.2242 | 1.5  | 287.0567 (100)                                                                                                                                                                                                   | Kaempferol- <i>O</i> -hexoside-deoxyhexoside-deoxyhexoside |
| 19 | 10.74 | <i>P. densiflora</i>      | C <sub>27</sub> H <sub>31</sub> O <sub>15</sub> | 595.1664 | 595.1663 | 0.2  | 287.0567 (100)                                                                                                                                                                                                   | Kaempferol- <i>O</i> -hexoside-deoxyhexoside               |
| 19 | 10.74 | <i>B. maritima</i>        | C <sub>27</sub> H <sub>31</sub> O <sub>15</sub> | 595.1670 | 595.1663 | 1.2  | 287.0566 (100)                                                                                                                                                                                                   | Kaempferol- <i>O</i> -hexoside-deoxyhexoside               |
| 20 | 10.76 | <i>B. maritima</i>        | C <sub>33</sub> H <sub>41</sub> O <sub>19</sub> | 741.2241 | 741.2242 | -0.1 | 287.0565 (100)                                                                                                                                                                                                   | Kaempferol- <i>O</i> -hexoside-deoxyhexoside-deoxyhexoside |
| 21 | 10.86 | <i>B. harleyi</i>         | C <sub>33</sub> H <sub>41</sub> O <sub>20</sub> | 757.2187 | 757.2191 | -0.5 | 303.0515 (100)                                                                                                                                                                                                   | Quercetin- <i>O</i> -hexoside-deoxyhexoside-deoxyhexoside  |
| 22 | 10.90 | <i>B. harleyi</i>         | C <sub>27</sub> H <sub>31</sub> O <sub>16</sub> | 611.1614 | 611.1612 | 0.3  | 303.0517 (100)                                                                                                                                                                                                   | Quercetin- <i>O</i> -hexoside-deoxyhexoside                |
| 23 | 10.93 | <i>N. multiglandulosa</i> | C <sub>27</sub> H <sub>43</sub> O <sub>7</sub>  | 479.3013 | 479.3009 | 0.8  | 479.3017 (10), 461.2912 (30), 443.2816 (70), 425.2692 (100), 407.2585 (50), 389.2487 (10), 383.2599 (25), 351.1992 (10), 343.2313 (25), 311.2036 (25), 281.566 (30)                                              | 5-hydroxypodecdysone B                                     |
| 24 | 10.96 | <i>N. multiglandulosa</i> | C <sub>27</sub> H <sub>45</sub> O <sub>8</sub>  | 497.3119 | 497.3114 | 1.0  | 497.3134 (40), 479.3018 (10), 461.2907 (20), 443.2819 (70), 425.2698 (100), 407.2598 (45), 387.219 (20), 369.2086 (45), 351.1957 (65), 343.2288 (20), 311.2013 (25), 309.1983 (20), 281.1558 (30), 269.1534 (20) | Integristerone A                                           |
| 25 | 11.04 | <i>N. multiglandulosa</i> | C <sub>27</sub> H <sub>43</sub> O <sub>6</sub>  | 463.3063 | 463.3060 | 0.6  | 463.3047 (10), 445.2959 (100), 427.2848 (40), 409.2748 (30), 391.2643 (10), 371.2236 (15), 353.2130 (10), 329.117 (20), 301.1812 (80), 283.1714 (20), 165.287 (50)                                               | Podecdysone B                                              |
| 26 | 11.06 | <i>H. restingae</i>       | C <sub>27</sub> H <sub>31</sub> O <sub>14</sub> | 579.1715 | 579.1714 | 0.3  | 433.1161 (20), 415.1041 (15), 397.0915 (30), 379.0824 (45), 367.0836 (45), 349.0751 (15), 337.0729 (90), 313.0727 (100), 283.0616 (85)                                                                           | Apigenin- <i>C</i> -hexoside-deoxyhexoside                 |

|    |       |                           |                                                 |           |           |      |                                                                                                 |                                                                                                  |
|----|-------|---------------------------|-------------------------------------------------|-----------|-----------|------|-------------------------------------------------------------------------------------------------|--------------------------------------------------------------------------------------------------|
| 27 | 11.09 | <i>N. multiglandulosa</i> | C <sub>27</sub> H <sub>45</sub> O <sub>7</sub>  | 481.3162  | 481.3165  | -0.6 | 481.1698 (10), 445.2972 (100),<br>427.2838 (55), 409.2762 (40), 371.2232<br>(70), 162.1285 (80) | Ecdysterone                                                                                      |
| 28 | 11.19 | <i>P. densiflora</i>      | C <sub>39</sub> H <sub>51</sub> O <sub>24</sub> | 903.2742  | 903.2770  | -3.1 | 287.0557 (100)                                                                                  | Kaempferol- <i>O</i> -hexoside-<br>hexoside-deoxyhexoside-<br>deoxyhexoside                      |
| 29 | 11.22 | <i>P. densiflora</i>      | C <sub>33</sub> H <sub>41</sub> O <sub>20</sub> | 757.2161  | 757.2191  | -4.0 | 287.0558 (100)                                                                                  | Kaempferol- <i>O</i> -hexoside-<br>hexoside-deoxyhexoside                                        |
| 30 | 11.77 | <i>B. harleyi</i>         | C <sub>27</sub> H <sub>31</sub> O <sub>16</sub> | 611.1612  | 611.1612  | 0.0  | 303.0515 (100)                                                                                  | Quercetin- <i>O</i> -hexoside-<br>deoxyhexoside                                                  |
| 31 | 11.92 | <i>P. densiflora</i>      | C <sub>33</sub> H <sub>41</sub> O <sub>19</sub> | 741.2241  | 741.2242  | -0.1 | 287.0565 (100)                                                                                  | Kaempferol- <i>O</i> -hexoside-<br>deoxyhexoside-<br>deoxyhexoside                               |
| 31 | 11.93 | <i>B. harleyi</i>         | C <sub>33</sub> H <sub>41</sub> O <sub>19</sub> | 741.2224  | 741.2242  | -2.4 | 287.0559 (100)                                                                                  | Kaempferol- <i>O</i> -hexoside-<br>deoxyhexoside-<br>deoxyhexoside                               |
| 32 | 12.01 | <i>B. harleyi</i>         | C <sub>21</sub> H <sub>21</sub> O <sub>12</sub> | 465.1036  | 465.1033  | 0.6  | 303.0513 (100)                                                                                  | Quercetin- <i>O</i> -hexoside                                                                    |
| 33 | 12.03 | <i>M. bahiana</i>         | C <sub>27</sub> H <sub>31</sub> O <sub>16</sub> | 611.1608  | 611.1612  | -0.7 | 303.0517 (100)                                                                                  | Quercetin- <i>O</i> -hexoside-<br>deoxyhexoside                                                  |
| 34 | 12.04 | <i>N. multiglandulosa</i> | C <sub>32</sub> H <sub>39</sub> O <sub>19</sub> | 727.2078  | 727.2086  | -0.8 | 287.0565 (100)                                                                                  | Kaempferol- <i>O</i> -hexoside-<br>deoxyhexoside-pentoside                                       |
| 35 | 12.05 | <i>H. restingae</i>       | C <sub>28</sub> H <sub>25</sub> O <sub>16</sub> | 617.1136  | 617.1143  | -1.1 | 303.0513 (90), 297.0614 (15), 171.0312<br>(10), 153.0197 (100)                                  | Quercetin- <i>O</i> -galloyl-<br>hexoside                                                        |
| 36 | 12.06 | <i>B. harleyi</i>         | C <sub>27</sub> H <sub>31</sub> O <sub>16</sub> | 611.1617  | 611.1612  | 0.8  | 303.0515 (100)                                                                                  | Quercetin- <i>O</i> -hexoside-<br>deoxyhexoside                                                  |
| 37 | 12.16 | <i>H. restingae</i>       | C <sub>28</sub> H <sub>25</sub> O <sub>16</sub> | 617.1126  | 617.1143  | -2.8 | 303.0510 (100), 153,0196 (95)                                                                   | Quercetin- <i>O</i> -galloyl-<br>hexoside                                                        |
| 38 | 12.27 | <i>B. intermedia</i>      | C <sub>21</sub> H <sub>21</sub> O <sub>12</sub> | 465.1026  | 465.1033  | -1.5 | 303,0508 (100)                                                                                  | Quercetin- <i>O</i> -hexoside                                                                    |
| 38 | 12.27 | <i>M. bahiana</i>         | C <sub>21</sub> H <sub>21</sub> O <sub>12</sub> | 465.1038  | 465.1033  | 1.1  | 303,0514 (100)                                                                                  | Quercetin- <i>O</i> -hexoside                                                                    |
| 39 | 12.61 | <i>N. multiglandulosa</i> | C <sub>33</sub> H <sub>41</sub> O <sub>20</sub> | 757.2170  | 757.2191  | -2.8 | 317.0662 (100)                                                                                  | Methoxy-quercetin- <i>O</i> -<br>hexoside-deoxyhexoside-<br>pentoside                            |
| 40 | 12.66 | <i>P. densiflora</i>      | C <sub>50</sub> H <sub>61</sub> O <sub>29</sub> | 1125.3295 | 1125.3299 | -0.4 | 287.0564 (50), 207.0675 (100),<br>175.0408 (20)                                                 | Kaempferol- <i>O</i> -hexoside-<br>hexoside-hexoside-<br>deoxyhexoside-<br>dimethoxyferulic acid |

|    |       |                           |                                                 |           |           |      |                                                                                                          |                                                                           |
|----|-------|---------------------------|-------------------------------------------------|-----------|-----------|------|----------------------------------------------------------------------------------------------------------|---------------------------------------------------------------------------|
| 41 | 13.02 | <i>B. intermedia</i>      | C <sub>28</sub> H <sub>25</sub> O <sub>16</sub> | 617.1155  | 617.1143  | 1.9  | 303.0524 (30), 233.0470 (25), 205.0526 (20), 153.0203 (100)                                              | Quercetin- <i>O</i> -galloyl-hexoside                                     |
| 42 | 13.41 | <i>N. multiglandulosa</i> | C <sub>28</sub> H <sub>33</sub> O <sub>16</sub> | 625.1757  | 625.1769  | -1.9 | 317.0670 (100)                                                                                           | Methoxy-quercetin- <i>O</i> -hexoside-deoxyhexoside                       |
| 43 | 13.43 | <i>B. harleyi</i>         | C <sub>26</sub> H <sub>29</sub> O <sub>15</sub> | 581.1502  | 581.1506  | -0.7 | 303.0516 (1000)                                                                                          | Quercetin- <i>O</i> -deoxyhexoside-pentoside                              |
| 44 | 13.44 | <i>B. harleyi</i>         | C <sub>20</sub> H <sub>19</sub> O <sub>11</sub> | 435.0935  | 435.0927  | 1.8  | 303.0506 (100)                                                                                           | Quercetin- <i>O</i> -pentoside                                            |
| 45 | 13.52 | <i>B. harleyi</i>         | C <sub>27</sub> H <sub>31</sub> O <sub>15</sub> | 595.1666  | 595.1663  | 0.5  | 287.0568 (100)                                                                                           | Kaempferol- <i>O</i> -hexoside-deoxyhexoside                              |
| 46 | 13.52 | <i>P. densiflora</i>      | C <sub>49</sub> H <sub>59</sub> O <sub>28</sub> | 1095.3199 | 1095.3193 | 0.5  | 287.0564 (50), 177.0569 (100), 145.0292 (10)                                                             | Kaempferol- <i>O</i> -hexoside-hexoside-deoxyhexoside-methoxycaffeic acid |
| 47 | 13.53 | <i>A. septentrionalis</i> | C <sub>27</sub> H <sub>31</sub> O <sub>15</sub> | 595.1670  | 595.1663  | 1.2  | 287.0562 (100)                                                                                           | Kaempferol- <i>O</i> -hexoside-deoxyhexoside                              |
| 48 | 13.65 | <i>B. intermedia</i>      | C <sub>20</sub> H <sub>19</sub> O <sub>11</sub> | 435.0933  | 435.0927  | 1.4  | 303.0513 (100)                                                                                           | Quercetin- <i>O</i> -pentoside                                            |
| 49 | 13.70 | <i>B. harleyi</i>         | C <sub>28</sub> H <sub>33</sub> O <sub>16</sub> | 625.1766  | 625.1769  | -0.5 | 317.0670 (100)                                                                                           | Methoxy-quercetin- <i>O</i> -hexoside-deoxyhexoside                       |
| 50 | 14.06 | <i>P. densiflora</i>      | C <sub>48</sub> H <sub>57</sub> O <sub>27</sub> | 1065.3075 | 1065.3087 | -1.1 | 287.0571 (80), 147.0458 (100)                                                                            | Kaempferol- <i>O</i> -hexoside-hexoside-deoxyhexoside-coumaric acid       |
| 51 | 14.10 | <i>B. laevifolia</i>      | C <sub>22</sub> H <sub>23</sub> O <sub>12</sub> | 479.1192  | 479.1190  | 0.4  | 317.0664 (100)                                                                                           | Methoxy-quercetin- <i>O</i> -hexoside                                     |
| 52 | 14.32 | <i>B. laevifolia</i>      | C <sub>21</sub> H <sub>21</sub> O <sub>11</sub> | 449.1085  | 449.1084  | 0.2  | 303.0512 (100)                                                                                           | Quercetin- <i>O</i> -deoxyhexoside                                        |
| 52 | 14.32 | <i>M. bahiana</i>         | C <sub>21</sub> H <sub>21</sub> O <sub>11</sub> | 449.1088  | 449.1084  | 0.9  | 303.0513 (100)                                                                                           | Quercetin- <i>O</i> -deoxyhexoside                                        |
| 53 | 14.54 | <i>B. laevifolia</i>      | C <sub>22</sub> H <sub>21</sub> O <sub>13</sub> | 493.0980  | 493.0982  | -0.4 | 317.0673 (100)                                                                                           | Methoxy-quercetin- <i>O</i> -glucuronic acid                              |
| 54 | 14.96 | <i>B. harleyi</i>         | C <sub>20</sub> H <sub>19</sub> O <sub>10</sub> | 419.0980  | 419.0978  | 0.5  | 287.0564 (100)                                                                                           | Kaempferol- <i>O</i> -pentoside                                           |
| 55 | 14.99 | <i>B. harleyi</i>         | C <sub>26</sub> H <sub>29</sub> O <sub>14</sub> | 565.1560  | 565.1557  | 0.5  | 287.0568 (100)                                                                                           | Kaempferol- <i>O</i> -deoxyhexoside-pentoside                             |
| 56 | 15.40 | <i>B. intermedia</i>      | C <sub>27</sub> H <sub>23</sub> O <sub>15</sub> | 587.1040  | 587.1037  | 0.5  | 303.0490 (10), 267.0518 (35), 249.0437 (20), 231.0308 (20), 207.0311 (45), 205.0518 (35), 154.0200 (100) | Quercetin- <i>O</i> -galloyl-pentoside                                    |



|           |       |                           |                                                 |          |          |      |                               |                                               |
|-----------|-------|---------------------------|-------------------------------------------------|----------|----------|------|-------------------------------|-----------------------------------------------|
| <b>57</b> | 15.60 | <i>B. laevifolia</i>      | C <sub>25</sub> H <sub>25</sub> O <sub>15</sub> | 565.1213 | 565.1193 | 3.5  | 317.0667 (100)                | Methoxy-quercetin- <i>O</i> -malonyl-hexoside |
| <b>58</b> | 16.33 | <i>B. laevifolia</i>      | C <sub>15</sub> H <sub>11</sub> O <sub>17</sub> | 463.1250 | 462.9996 | 0.9  | 317.0670 (100)                | Methoxy-quercetin- <i>O</i> -hexoside         |
| <b>59</b> | 17.88 | <i>M. bahiana</i>         | C <sub>28</sub> H <sub>25</sub> O <sub>15</sub> | 601.1186 | 601.1193 | -1.2 | 303.0513 (10), 153.0201 (100) | Quercetin- <i>O</i> -galloyl-deoxyhexoside    |
| <b>60</b> | 18.30 | <i>A. septentrionalis</i> | C <sub>24</sub> H <sub>25</sub> O <sub>13</sub> | 521.1296 | 521.1295 | 0.2  | 273.0774 (100)                | Naringenin- <i>O</i> -malonyl-hexoside        |
| <b>61</b> | 18.58 | <i>M. bahiana</i>         | C <sub>28</sub> H <sub>25</sub> O <sub>15</sub> | 601.1190 | 601.1193 | -0.5 | 303.0508 (10), 153.0191 (100) | Quercetin- <i>O</i> -galloyl-deoxyhexoside    |
| <b>62</b> | 18.58 | <i>M. bahiana</i>         | C <sub>13</sub> H <sub>15</sub> O <sub>8</sub>  | 299.0771 | 299.0767 | 1.3  | 153.0200 (100)                | Not identified                                |
| <b>63</b> | 18.58 | <i>M. bahiana</i>         | C <sub>13</sub> H <sub>13</sub> O <sub>7</sub>  | 281.0666 | 281.0661 | 1.8  | 280.0967 (50), 153.0203 (100) | Not identified                                |

**Table S13.** List of plant species used for the representative sample of Malpighiaceae species (RSMS) preparation: collection sites, dates and voucher codes, biomes and phylogenetic groups.

| Species                             | Collection sites  | Collection dates | Codes        | Herbarium* | Biome           | Phylogenetic group |
|-------------------------------------|-------------------|------------------|--------------|------------|-----------------|--------------------|
| <i>Byrsonima intermedia</i>         | Mogi Guaçu/SP     | Jan/2014         | IAC 55281    | IAC        | Cerrado         | Byrsonimoid        |
| <i>Mcvaughia bahiana</i>            | Monte Santo/BA    | Jan/2006         | Guedes 12148 | ALCB       | Atlantic Forest | Mcvaughoid         |
| <i>Barnebya harleyi</i>             | Itatim/BA         | Oct/2014         | Melo 1518    | HUEFS      | Caatinga        | Barnebyoid         |
| <i>Ptilochaeta densiflora</i>       | Corumbá/MS        | Apr/2010         | Carvalho 290 | HUEFS      | Pantanal        | Ptilochaetoid      |
| <i>Bunchosia maritima</i>           | Rio de Janeiro/RJ | Sep/2018         | I.R.C. 183   | RBv        | Atlantic Forest | Bunchosoid         |
| <i>Hiraea restingae</i>             | Sooretama/ES      | Jan/2012         | Almeida 518  | SP         | Atlantic Forest | Hiraeoid           |
| <i>Niedenzuella multiglandulosa</i> | Campo Grande/MS   | Nov/2015         | HMS 5206     | CGMS       | Cerrado         | Tetrapteroid       |
| <i>Banisteriopsis laevifolia</i>    | Rio de Janeiro/RJ | Sep/2018         | Mattos 317   | RBv        | Atlantic Forest | Stigmaphylloid     |
| <i>Amorimia septentrionalis</i>     | Maruim/SE         | Nov/2015         | Almeida 800  | HUEFS      | Atlantic Forest | Malpighioid        |

\***IAC:** Agronomic Institute of Campinas; **ALCB:** Herbarium Alexandre Leal Costa – Federal University of Bahia; **HUEFS:** Herbarium of State University of Feira de Santana; **RBv:** Arboretum of Rio de Janeiro Botanical Garden (living collection); **SP:** Institute of Botany of São Paulo; **CGMS:** Herbarium of Federal University of Mato Grosso do Sul.

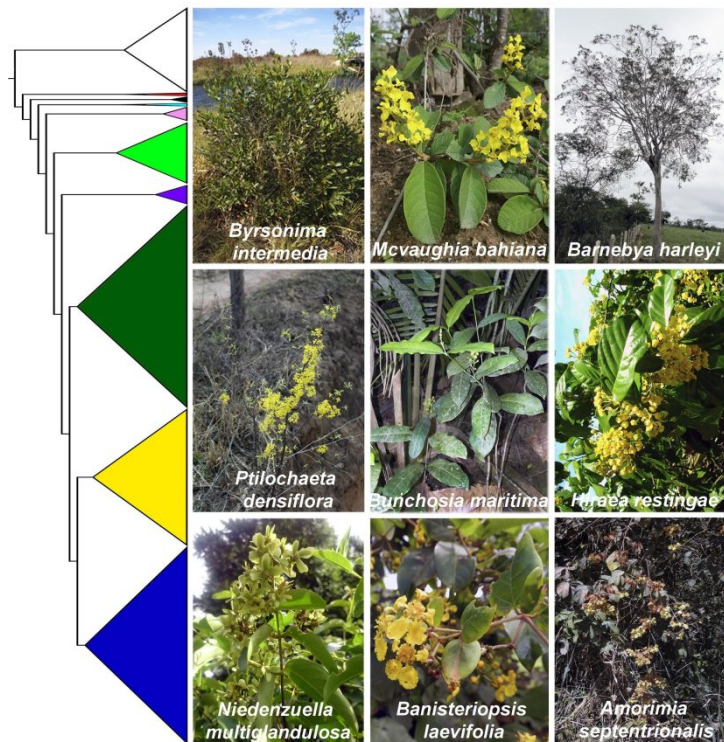

**Figure S14.** Field photographs of one species from each phylogenetic group from Malpighiaceae family. White - Byrsonimoid clade represented by the species *Byrsonima intermedia* (photograph by R.F. Almeida), Red - Acridocarpoid clade (not sampled in this study), Black - Mcvaughoid clade represented by the species *Mcvaughia bahiana* (photograph by I.R. Guesdon), Light Blue - Barnebyoid clade represented by the species *Barnebya harleyi* (photograph by F. Flores), Pink - Ptilochaetoid clade represented by the species *Ptilochaeta densiflora* (photograph by R.F. Almeida), Light Green - Bunchosiod clade represented by the species *Bunchosia maritima* (photograph by J.M.Braga), Purple - Hiraeoid clade represented by the species *Hiraea restingae* (photograph by R.F. Almeida), Dark Green - Tetrapteroid clade represented by the species *Niedenzuella multiglandulosa* (photograph by N. Carvalho, Yellow - Stigmaphylloid clade represented by the species *Banisteriopsis laevifolia* (photograph by C.F. Hall), and Dark Blue - Malpighioid clade represented by the species *Amorimia septentrionalis* (photograph by M.O.O. Pellegrini) (phylogenetic classification according to Davis and Anderson 2010).

## S15. Method validation

### *Specificity*

Specificity is the ability to the method to unequivocally assess and differentiate the analyte signals from potential compounds such as impurities, other matrix components or degradants, among others. In the present study, it was determined through the injection of the solvent solution containing only the internal standard (blank), the standards solution and the RSMS solution (n=3). Peaks retention times and resolution of (+)-catechin, (–)-epicatechin, ecdysterone and rutin present in the standard and sample solutions were used to calculate the relative standard deviation (RSD). In addition, the mass spectra of each compound present in both standard and RSMS solutions were recorded and used to confirm the specificity and identity of the peaks.

The detected peaks corresponded to (+)-catechin (4.88 min), (–)-epicatechin (6.25 min), ecdysterone (10.61 min) and rutin (11.56 min) in the RSMS solution, showed good resolutions (5.38, 1.98, 7.71 and 1.25, respectively) and did not show any interferences when compared to the standard solution. Moreover, the recorded mass spectra allowed the confirmation of each compound's identity.

### *Precision (repeatability and intermediate precision)*

The precision was estimated by the analysis of six RSMS solutions, each one injected once (n=6). Repeatability (or intraday precision) was expressed as the RSD of (+)-catechin, (–)-epicatechin, ecdysterone and rutin amounts (concentration of injection,  $\mu\text{g mL}^{-1}$ ) measured in two consecutive days. For the first day, the average concentrations measured for (+)-catechin, (–)-epicatechin, ecdysterone and rutin were 10.101, 13.644, 52.377 and 23.672  $\mu\text{g mL}^{-1}$ , respectively. For the second day, the average concentrations measured for (+)-catechin, (–)-epicatechin, ecdysterone and rutin were 10.446, 13.829, 52.545 and

23.605  $\mu\text{g mL}^{-1}$ , respectively. For intermediate precision, the results of the two days were compared through F-test.

In both days, the RSDs determined for all compounds were lower than 1% (Table 1). The intermediate precision, calculated by the F-test between the two different days, was also very satisfactory since no significant difference at  $F = 0.05$  ( $n=6-1$ ) was detected.

### *Linearity*

To determine the linearity of the method at the PDA detector, the calibration curves were prepared in the concentration range expected for each compound in RSMS. It was determined by elaborating calibration curves of each compound ranging from 2.2 to 278% of the working standards concentrations ( $n=3$ ). Internal standardization was also used to improve method confidence. For that, a stock standard solution containing (+)-catechin (100  $\mu\text{g mL}^{-1}$ ), (-)-epicatechin (150  $\mu\text{g mL}^{-1}$ ), ecdysterone (776  $\mu\text{g mL}^{-1}$ ), and rutin (300  $\mu\text{g mL}^{-1}$ ) in MeOH/H<sub>2</sub>O 1:1, was prepared for simultaneous acquisition of the analytical curves. From the stock solution, eleven concentration levels for each compound were prepared (in MeOH/H<sub>2</sub>O 1:1), ranging from (i) 0.2 to 25  $\mu\text{g mL}^{-1}$  for (+)-catechin, (ii) 0.3 to 37.5  $\mu\text{g mL}^{-1}$  for (-)-epicatechin, (iii) 1.6 to 194  $\mu\text{g mL}^{-1}$  for ecdysterone, and (iv) 0.6 to 75  $\mu\text{g mL}^{-1}$  for rutin. All solutions contained the internal standard sodium diclofenac at 15  $\mu\text{g mL}^{-1}$ . Each calibration concentration sample was injected in three replicates. The linearity was calculated based on the analytical curves built with the nominal concentration of each calibration point and the corresponded average values of the ratios between the area of each calibration point divided by the area of the internal standard ( $R = A_{\text{compound}}/A_{\text{IS}}$ ). The results were interpreted in function of the correlation coefficients (R) calculated for each compound.

The linear ranges of concentrations obtained were adequate for all compounds, and the obtained values of R coefficients were for 0.9996, 0.9994, 0.9995, 0.9994 for (+)-catechin, (–)-epicatechin, ecysterone and rutin, respectively (Table 1).

#### *Limits of detection (LOD) and limits of quantification (LOQ)*

Limits of detection (LODs) and quantification (LOQs) were estimated from the standard deviation of the y-intercept ( $S_b$ ) and the slope ( $a$ ) of three calibration curves prepared in three low concentrations. The mathematical calculations were performed using the following equations:  $LOD = 3.3S_b \cdot a^{-1}$  and  $LOQ = 10S_b \cdot a^{-1}$ , where  $a$  is the mean of slopes of the calibration curves and  $S_b$  is the SD of the y-intercept. For that, the same stock solution prepared for the determination of linearity was used. The three concentration levels for each compound were also prepared in MeOH/H<sub>2</sub>O 1:1, ranging from (i) 0.2 to 1  $\mu\text{g mL}^{-1}$  for (+)-catechin, (ii) 0.3 to 1.5  $\mu\text{g mL}^{-1}$  for (–)-epicatechin, (iii) 1.6 to 7.8  $\mu\text{g mL}^{-1}$  for ecysterone, and (iv) 0.6 to 3  $\mu\text{g mL}^{-1}$  for rutin. All solutions also contained the internal standard sodium diclofenac at 15  $\mu\text{g mL}^{-1}$  and were injected in triplicate.

The results obtained for the LOD and LOQ for (+)-catechin, (–)-epicatechin, ecysterone and rutin were 0.06, 0.02, 0.07 and 0.03  $\mu\text{g mL}^{-1}$  and 0.18, 0.06, 0.22 and 0.11  $\mu\text{g mL}^{-1}$ , respectively (Table 1).

#### *Accuracy*

Accuracy was determined by recovery studies, which was performed by standard addition of the analyte in the RSMS solution, in three different concentrations, considering the specified range of the analytical procedure. For that, previously analyzed standard and RSMS solutions were used to prepare three different concentration levels by spiking known amounts of the stock standards solution into the RSMS solution. Three replicates for each

level (low, intermediate and high, or at 66.7, 100.0 and 166.7 % levels, respectively) were prepared to obtain solutions containing 2.99, 8.99 and 14.99  $\mu\text{g mL}^{-1}$  of (+)-catechin, 4.18, 13.18 and 22.18  $\mu\text{g mL}^{-1}$  of (–)-epicatechin, 17.99, 64.55 and 111.11  $\mu\text{g mL}^{-1}$  of ecdysterone and 7.64, 25.64 and 43.64  $\mu\text{g mL}^{-1}$  of rutin. The percentage of recovery of each compound was analyzed using the validated method and the accuracy was calculated by the difference between the nominal and the experimentally measured contents.

Results show an average of recovery corresponded to 86.72% (low level), 88.71% (intermediate level) and 93.73% (high level), taking into account all compounds in each level. Considering each compound separately, the RSD was lower than 5% (Table 1).
